# Supplementary material for: The role of cattle manure-driven polysaccharide precursors in humus formation during composting of spent mushroom substrate
Source: Front Microbiol. 2024 Jul 18;15:1375808. doi: 10.3389/fmicb.2024.1375808 (PMC11291364; doi:10.3389/fmicb.2024.1375808)
Supplement: Supplementary file 1 [file Table_1.XLSX]

## Sheet: Sheet1
Supplementary Table S1.
Materials	TOC	TN	P2O5	K2O	MC	pH	EC
	（g/kg）	（g/kg）	（g/kg）	（g/kg）	（%）	（g/kg）	（mS/cm）
Spent mushroom substrate	206.05	15.34	9.35	10.21	42.08	8.013	3.31
Cattle manure	283.85	26.01	13.41	16.53	67.63	7.038	4.43
Supplementary Table S2.
Time（d)	Mesophilic phases		Thermophilic phases		Cooling phases		Maturation phases
	1d		3d		17d		36d
Treament	CD	CK	CD	CK	CD	CK	CD	CK
T	41.33±0.58c	32.67±1.15a	53.33±0.58a	42.33±0.58a	52.73±1.30a	35.67±7.23a	43.17±0.86b	38.67±5.86a
pH	7.79±0.00a	7.92±0.01a	7.74±0.01b	7.78±0.02b	7.80±0.01a	7.79±0.03b	7.47±0.02c	7.49±0.01c
EC	3.28±0.04c	3.23±0.02b	3.47±0.12b	2.83±0.28c	2.83±0.06d	3.18±0.10b	3.87±0.04a	2.68±0.10c
OM	422.66±5.95a	291.43±5.56ab	396.78±4.26b	271.42±15.05bc	382.22±2.88c	296.94±9.12a	372.12±7.54c	258.43±14.95c
GI	87.38±12.27a	52.47±7.24b	66.27±25.25a	75.74±31.38b	87.13±36.31a	78.30±5.62b	73.18±12.75a	130.97±15.02a
PHI	81.42±1.19ab	68.17±1.49b	82.10±2.34a	73.33±2.79a	78.13±1.06b	73.82±2.03a	80.19±1.97ab	76.43±1.81a
TOC	245.16±3.45a	169.04±3.23ab	230.15±2.47b	157.44±8.73bc	221.71±1.67c	172.24±5.29a	215.85±4.37c	149.90±8.67c
N	16.44±0.32a	14.53±0.08a	16.30±0.56ab	13.17±0.30b	16.19±0.49ab	13.93±1.14a	15.52±0.16b	14.52±0.31a
P	9976.33±212.90a	8387.62±449.34b	10209.68±219.17a	7797.73±141.91c	9974.22±243.82a	9532.45±235.52a	9831.23±230.51a	8966.82±253.28ab
K	12021.48±256.54a	10107.08±541.46b	12302.67±264.10a	9396.26±170.99c	12018.93±293.80a	11486.60±283.80a	11846.63±277.77a	10805.02±305.21ab
AK	476.10±6.54ab	554.98±7.09a	472.73±6.97ab	562.77±8.20a	416.75±52.70b	558.52±2.58a	499.20±26.33a	440.58±11.45b
AP	435.49±31.02a	219.66±26.29ab	437.78±31.02a	193.49±4.84b	487.38±48.24a	250.89±19.14a	421.71±7.67a	262.37±28.37a
NH4+-N	84.42±6.74a	49.81±2.32c	73.28±5.47b	65.80±2.05b	94.57±20.53ab	142.58±11.04a	84.91±7.06a	34.87±0.30d
NO3--N	1193.75±37.58c	3016.84±407.48b	1467.70±70.46bc	1515.14±347.61c	1622.84±308.31ab	1538.26±286.02c	1895.39±133.02a	4072.22±366.96a
